# Supplementary material for: Investigations of aged metal seals for transport package safety assessment
Source: Copernicus journal article supplement (doi:10.5194/sand-2-23-2023), 2023-09-06
Supplement: Supplementary file 1 [file sand-2-23-2023-supplement.pdf]

Supplement of Saf. Nucl. Waste Disposal, 2, 23–23, 2023  
<https://doi.org/10.5194/sand-2-23-2023-supplement>  
© Author(s) 2023. CC BY 4.0 License.

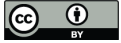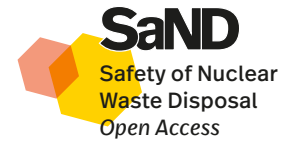

*Supplement of*

## **Investigations of aged metal seals for transport package safety assessment**

**Annette Rolle et al.**

*Correspondence to:* Annette Rolle (annette.rolle@bam.de)

The copyright of individual parts of the supplement might differ from the article licence.

# Investigations of Aged Metal Seals for Transport Package Safety Assessment

Annette Rolle, Tino Neumeyer, Viktor Ballheimer, Frank Wille

Bundesanstalt für Materialforschung und -prüfung (BAM), Berlin, Germany

**Background:** To ensure the required tightness for transport and storage cask for high level radioactive material usually metal seals of the Helicoflex® Type are used. The mechanical and thermal loadings associated with the conditions of transport specified in the IAEA-regulations (such as 0.3 and 9 m drop test and 800°C fire test) can have a significant effect on the leak tightness of the sealing system and require potent seals. Due to the long-term use, the seal behavior is influenced by temperature and time.

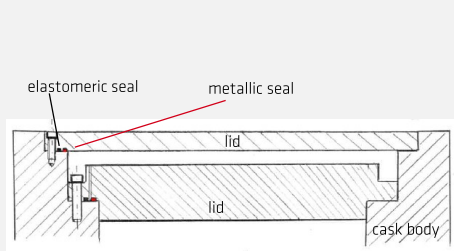

Figure 1: Example for an usual transport cask sealing system

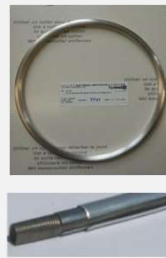

Figure 2: Seal Helicoflex® HN200: spring, inner jacket (stainless steel) and outer jacket (aluminum or silver)

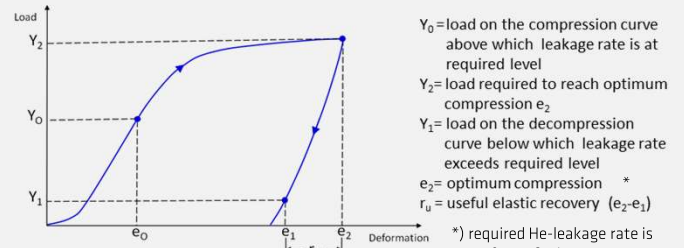

Figure 3: Characteristic curve (load/deformation) of a Helicoflex® HN200 seal

**Question:** How does ageing of metal seals influence the sealing efficiency under the special condition, when deformation or short term displacement of cask components made possible a little seal repositioning before compression again?

## Test set up and procedure:

1. Compression of flange pairs with metal seals (5 with Al- and 5 with Ag-jacket) in test flanges, measurement of leak tightness,
2. ageing at 125°C for 3 months,
3. flange pair opening, seal repositioning, repeated compression.

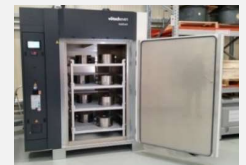

Figure 5: Temperature chamber

Measurement of sealing forces, deformation and leak tightness were performed during all compression and relief cycles.

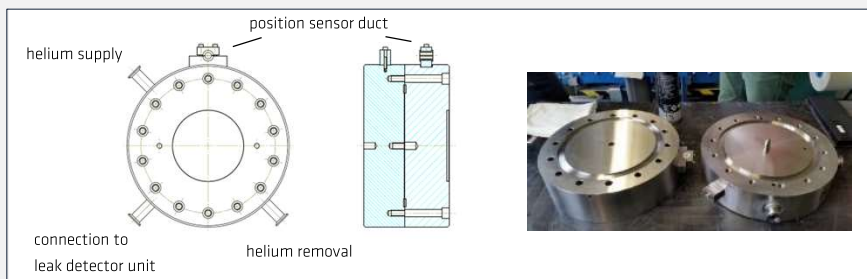

Figure 4: Test flanges

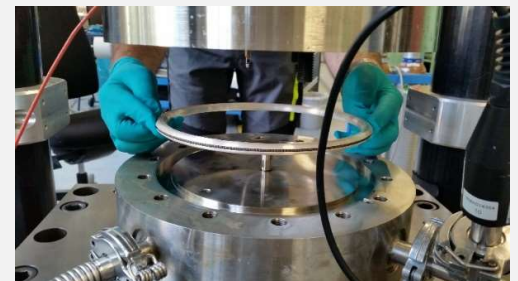

Figure 6: Lifting/repositioning of the seal before repeated compression

## First results:

1. With parameters chosen for ageing reliable  $y_2$  reduction is achievable (30 % for Ag-seals, 40 % for Al-seals).
2. Tightness after ageing before flange opening was always better than He-leakage rate  $10^{-8} \text{ Pa m}^3 \text{ s}^{-1}$ .
3. After flange opening, seal movement and repeated compression, leakage rate of the Ag-seal was still better than  $10^{-8} \text{ Pa m}^3 \text{ s}^{-1}$  but, leakage rate of the Al-seals was significant higher than  $10^{-8} \text{ Pa m}^3 \text{ s}^{-1}$ .
4. An influence of the way of seal movement could not be detected.

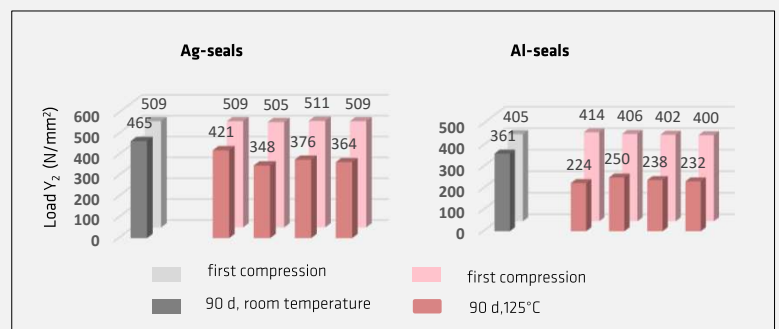

Figure 7: Reduction of  $Y_2$  after ageing (90d, 125°C)

**Next step planned:** Variation of ageing conditions
